# Supplementary material for: Nannochloropsis, a rich source of diacylglycerol acyltransferases for engineering of triacylglycerol content in different hosts
Source: PubMed Central journal article supplement (PMC5210179; doi:10.1186/s13068-016-0686-8), 2017-01-03
Supplement: 13068_2016_686_MOESM13_ESM.pdf [file 13068_2016_686_MOESM13_ESM.pdf]

| <b>GENE NAME</b> | <b>GENE ID</b> | <b>(5')FORWARD PRIMER<sup>(3')</sup></b> | <b>(5')REVERSE PRIMER<sup>(3')</sup></b> |
|------------------|----------------|------------------------------------------|------------------------------------------|
| <i>NoDGAT1</i>   | CCMP1779_3520  | GAGCATTCTGCGTCCGTTC                      | CCCATCTTGACACAGTCGCT                     |
| <i>NoDGTT1</i>   | CCMP1779_4340  | TTATTTGAAATGTGGTGTATTGC                  | CTGACAGAAGAGACTATGGT                     |
| <i>NoDGTT2</i>   | CCMP1779_3705  | GCTCACCTCTTCCGTCGTAG                     | CGGCTCGATTTCCGGATGAGA                    |
| <i>NoDGTT3</i>   | CCMP1779_7206  | GTCGTGGCTCTTCCGAGAAA                     | GAGAGGAAGGATACCGTGCG                     |
| <i>NoDGTT4</i>   | CCMP1779_9929  | GGAGATGTTGGTGGAGAG                       | GTAGTAGTAGTTGTCGTAGCA                    |
| <i>NoDGTT5</i>   | CCMP1779_3915  | CAGCAAATGTTCAATGTGG                      | TAGTAAAGCTCCTCGACCTT                     |
| <i>NoDGTT6</i>   | CCMP1779_9590  | ATGTCCTCCTTCTTGC GTTGGC                  | GCTATTATTCTTACCGCTGCTACTGC               |
| <i>NoDGTT7</i>   | CCMP1779_3159  | GGCTGTTCAAGTGTATCT                       | CCATTCGTATAAACCTTTCC                     |
| <i>NoDGTT8</i>   | CCMP1779_358   | CCTCACCATCTGCACCTGAG                     | TGAAGGGGCTTGAAGCAAA                      |
| <i>NoDGTT9</i>   | CCMP1779_10272 | CGTTCGTCTTTGGGGAGGAA                     | CTTTCCGACGAACGCAACTG                     |
| <i>NoDGTT10</i>  | CCMP1779_3159  | CCGGAAATGTGAGACACGGA                     | CCCACCACCTCGACTGAAAA                     |
| <i>NoDGTT11</i>  | CCMP1779_5368  | CGGAGCCTTTGTTGTTTCGG                     | TGAGCCACCAACCAGAATCC                     |
| <i>NoDGTT12</i>  | CCMP1779_3592  | ATATCCGTATGTTGTCAAGGT                    | GAAGCCGTAGGTGAAGAG                       |
| <i>NoACTIN</i>   | CCMP1779_1821  | GCCGTTATTGGATGGATATG                     | AACAACCTCTCCTTCACA                       |
| <i>AtACTIN2</i>  | At3g18780      | TGTGACAATGGTACCGGTATGG                   | GCCCTGGGAGCATCATCTC                      |

**Table S1.** Primers used for reverse transcription quantitative PCR.
