# Supplementary material for: Nannochloropsis, a rich source of diacylglycerol acyltransferases for engineering of triacylglycerol content in different hosts
Source: PubMed Central journal article supplement (PMC5210179; doi:10.1186/s13068-016-0686-8), 2017-01-03
Supplement: 13068_2016_686_MOESM15_ESM.pdf [file 13068_2016_686_MOESM15_ESM.pdf]

| <b>GENE NAME</b>             | <b>GENE ID</b> | <b><sup>(5')</sup>FORWARD PRIMER<sup>(3')</sup></b> | <b><sup>(5')</sup>REVERSE PRIMER<sup>(3')</sup></b> |
|------------------------------|----------------|-----------------------------------------------------|-----------------------------------------------------|
| <i>NoDGTT5</i>               | CCMP1779_3915  | ATGACGCCGCAAGCCGACATCACC<br>AGCAAGACGA              | CTCAATGGACAACGGGCGCGTCTCCC<br>ACTCC                 |
| <i>NoDGTT5</i><br><i>PRO</i> | CCMP1779_3915  | CACCGATAGAAAGTTGATAGGCAA                            | CCTGAAGATAAAGGAGTTGC                                |

**Table S3.** Primers used for amplification of sequences of listed genes without stop codon for cloning into pEarleyGate 101 vector. DGTT5 PRO refers to *NoDGTT5* sequence including its native promoter.
