# Supplementary material for: Nannochloropsis, a rich source of diacylglycerol acyltransferases for engineering of triacylglycerol content in different hosts
Source: Springer Nature journal article supplement (doi:10.1186/s13068-016-0686-8), 2017-01-03
Supplement: MOESM6 [file 13068_2016_686_MOESM6_ESM.pdf]

| GENE NAME      | GENE ID       | GenBank<br>ACCESSION<br>NUMBER | <sup>(5)</sup> FORWARD PRIMER <sup>(3)</sup> | <sup>(5)</sup> REVERSE PRIMER <sup>(3)</sup> |
|----------------|---------------|--------------------------------|----------------------------------------------|----------------------------------------------|
| <i>NoDGTT1</i> | CCMP1779_4340 | KY273668                       | ATGTACCCAATCAAGCTGTGCTTCCTC                  | TCACTTAATAAGCAGCTTCTTGCCG                    |
| <i>NoDGTT2</i> | CCMP1779_3705 | KY273669                       | ATGGCTCACCTCTTCCGTCG                         | AGAGATCGCAACGAACTCCTCG                       |
| <i>NoDGTT3</i> | CCMP1779_7206 | KY273670                       | ATGGGCGCTACCACCGAGACCCA<br>GACTAAA           | CGACTTCGGACAGTCCCAAATCTC<br>CAACTCTCGCGT     |
| <i>NoDGTT4</i> | CCMP1779_9929 | KY273671                       | ATGAAGCGGGCGGCAGCA                           | GCAGCGTCGCGACTGGTCT                          |
| <i>NoDGTT5</i> | CCMP1779_3915 | KY273672                       | ATGACGCCGCAAGCCGACATCACC<br>AGCAAGACGA       | CTCAATGGACAACGGGCGCGTCTC<br>CCACTCC          |
| <i>NoDGTT6</i> | CCMP1779_9590 | KY273673                       | ATGTCCTCCTTCTTGCGTTGGC                       | GCTATTATTCTTACCGCTGCTACTGC                   |

**Table S2.** Primers used for amplification of *NoDGTT1-NoDGTT6* full sequences for cloning into pYES2.1/V5-His-TOPO<sup>®</sup> vector.
