# Supplementary material for: Nannochloropsis, a rich source of diacylglycerol acyltransferases for engineering of triacylglycerol content in different hosts
Source: Springer Nature journal article supplement (doi:10.1186/s13068-016-0686-8), 2017-01-03
Supplement: MOESM12 [file 13068_2016_686_MOESM12_ESM.pdf]

| PHYLOGENETIC CLASS           | ORGANISM                                | DGAT GENE       | SEQUENCE REFERENCE             | LITERATURE REFERENCE |
|------------------------------|-----------------------------------------|-----------------|--------------------------------|----------------------|
| eustigmatophyceae<br>(algae) | <i>Nannochloropsis oceanica</i> CMP1779 | <i>NoDGAT1</i>  | NannoCCMP1779_3520             | [1]                  |
|                              |                                         | <i>NoDGTT1</i>  | NannoCCMP1779_4340             | [1]                  |
|                              |                                         | <i>NoDGTT2</i>  | NannoCCMP1779_3705             | [1]                  |
|                              |                                         | <i>NoDGTT3</i>  | NannoCCMP1779_7206             | [1]                  |
|                              |                                         | <i>NoDGTT4</i>  | NannoCCMP1779_9929             | [1]                  |
|                              |                                         | <i>NoDGTT5</i>  | NannoCCMP1779_3915             | [1]                  |
|                              |                                         | <i>NoDGTT6</i>  | NannoCCMP1779_9590             | [1]                  |
|                              |                                         | <i>NoDGTT7</i>  | NannoCCMP1779_3159             | [1]                  |
|                              |                                         | <i>NoDGTT8</i>  | NannoCCMP1779_358              | [1]                  |
|                              |                                         | <i>NoDGTT9</i>  | NannoCCMP1779_10272            | [1]                  |
|                              |                                         | <i>NoDGTT10</i> | NannoCCMP1779_5368             | [1]                  |
|                              |                                         | <i>NoDGTT11</i> | NannoCCMP1779_3592             | [1]                  |
| <i>NoDGTT12</i>              | NannoCCMP1779_3520                      | [1]             |                                |                      |
| brassicales<br>(plant)       | <i>Arabidopsis thaliana</i>             | <i>AtDGAT1</i>  | NCBI Ref. Seq.:<br>NP_179535.1 | [2]                  |
|                              |                                         | <i>AtDGAT2</i>  | NCBI Ref. Seq.:<br>NP_566952.1 | [2]                  |

|                      |                         |                |                                |     |
|----------------------|-------------------------|----------------|--------------------------------|-----|
| mammalia<br>(animal) | <i>Mus musculus</i>     | <i>MmDGAT1</i> | NCBI Ref. Seq.:<br>NP_034176.1 | [2] |
|                      | <i>Ratus norvegicus</i> | <i>RnDGAT1</i> | NCBI Ref. Seq.:<br>NP_445889.1 | [3] |
|                      | <i>Homo sapiens</i>     | <i>HsDGAT1</i> | NCBI Ref. Seq.:<br>NP_036211.2 | [3] |
|                      |                         | <i>HsDGAT2</i> | NCBI Ref. Seq.:<br>NP_835470.1 | [3] |

---

**Table S5.** Information on DGATs sequences used for analysis with PRALINE software.

References:

1. Vieler A, Wu G, Tsai CH, Bullard B, Cornish AJ, Harvey C, Reca IB, Thornburg C, Achawanantakun R, Buehl CJ *et al*: **Genome, functional gene annotation, and nuclear transformation of the heterokont oleaginous alga *Nannochloropsis oceanica* CCMP1779.** *PLoS genetics* 2012, **8**(11):e1003064.
2. Chen JE, Smith AG: **A look at diacylglycerol acyltransferases (DGATs) in algae.** *Journal of biotechnology* 2012, **162**(1):28-39.
3. Cao H: **Structure-Function Analysis of Diacylglycerol Acyltransferase Sequences from 70 Organisms.** *BMC Research Notes* 2011, **4**:249.
