# Supplementary material for: Nannochloropsis, a rich source of diacylglycerol acyltransferases for engineering of triacylglycerol content in different hosts
Source: Springer Nature journal article supplement (doi:10.1186/s13068-016-0686-8), 2017-01-03
Supplement: MOESM14 [file 13068_2016_686_MOESM14_ESM.pdf]

| GENE NAME      | GENE ID | <sup>(5')</sup> FORWARD PRIMER <sup>(3')</sup> | <sup>(5')</sup> REVERSE PRIMER <sup>(3')</sup>   |
|----------------|---------|------------------------------------------------|--------------------------------------------------|
| LDSP<br>3' UTR | -       | GAGCTCGAAAGATCCAAGAGA<br>GACGAG                | CTTAAGGTGATGCTGTTGCTCTTTCC                       |
| EF PRO         | -       | CACCTATAGCTACATGGTAGC<br>TAG                   | TGTTACGAAGTGAGGGTTGAG                            |
| VFP            | -       | GTTAACCAATTGGGGAGCGGC<br>ATGGTGAGCAAGGGCGAG    | ACGCGTAGGCCTGCCGCTTCCTTTG<br>TACAACATCCATCCCAAGC |
| GFP            | -       | CGTAAACGGCCACAAGTTCA                           | CGCTTTACTTGTACAGCTCGT                            |

**Table S4.** Primers used for amplification of sequences of *pnoc ox venus* vector and *pnoc gfp dgtt5pro* vector used for transformation of *N. oceanica* CCMP1779; LDSP; lipid droplet surface protein, EF; elongation factor, VFP; venus fluorescent protein, GFP; green fluorescent protein.
